# Supplementary material for: Deleterious effects of non-framework Al species on the catalytic performance of ZSM-5 crystals synthesized at low temperature
Source: Royal Society of Chemistry journal article supplement (doi:10.1039/c9re00231f), 2019-01-01
Supplement: c9re00231f1.pdf [file c9re00231f1.pdf]

Supporting Information for

**Deleterious Effects of Non-framework Al Species on  
the Catalytic Performance of ZSM-5 Crystals  
Synthesized at Low Temperature**

*Wei Qin, Yunwen Zhou, and Jeffrey D. Rimer\**

Department of Chemical and Biomolecular Engineering, University of Houston, 4726 Calhoun  
Road, Houston, TX 77204 USA

\* Correspondence sent to: [jdrimer@central.uh.edu](mailto:jdrimer@central.uh.edu)

**List of Figures**

Figure S1. Powder XRD patterns of as-made ZSM-5 samples prepared with different sol gel Si/Al ratios

Figure S2. Nitrogen adsorption/desorption isotherms of calcined ZSM-5 samples

Figure S3. Product yields from syntheses of ZSM-5 at varying sol gel Si/Al ratio

Figure S4. Deconvolution of  $^{27}\text{Al}$  MAS NMR spectra of various H-form ZSM-5 samples

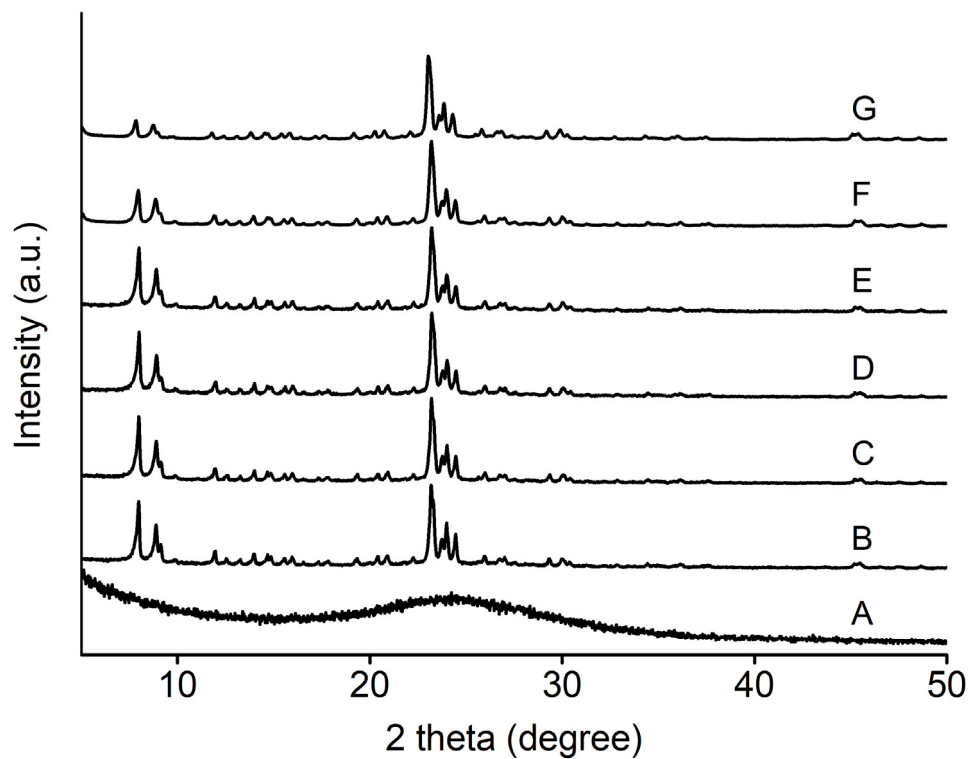

**Figure S1.** Powder X-ray diffraction (XRD) patterns of as-made ZSM-5 samples prepared with different sol gel Si/Al ratios: (A) Z20, (B) Z30, (C) Z50, (D) Z75, (E) Z100, (F) Z22-1, and (G) Z22-2. The XRD patterns are offset along the y-axis for visual clarity.

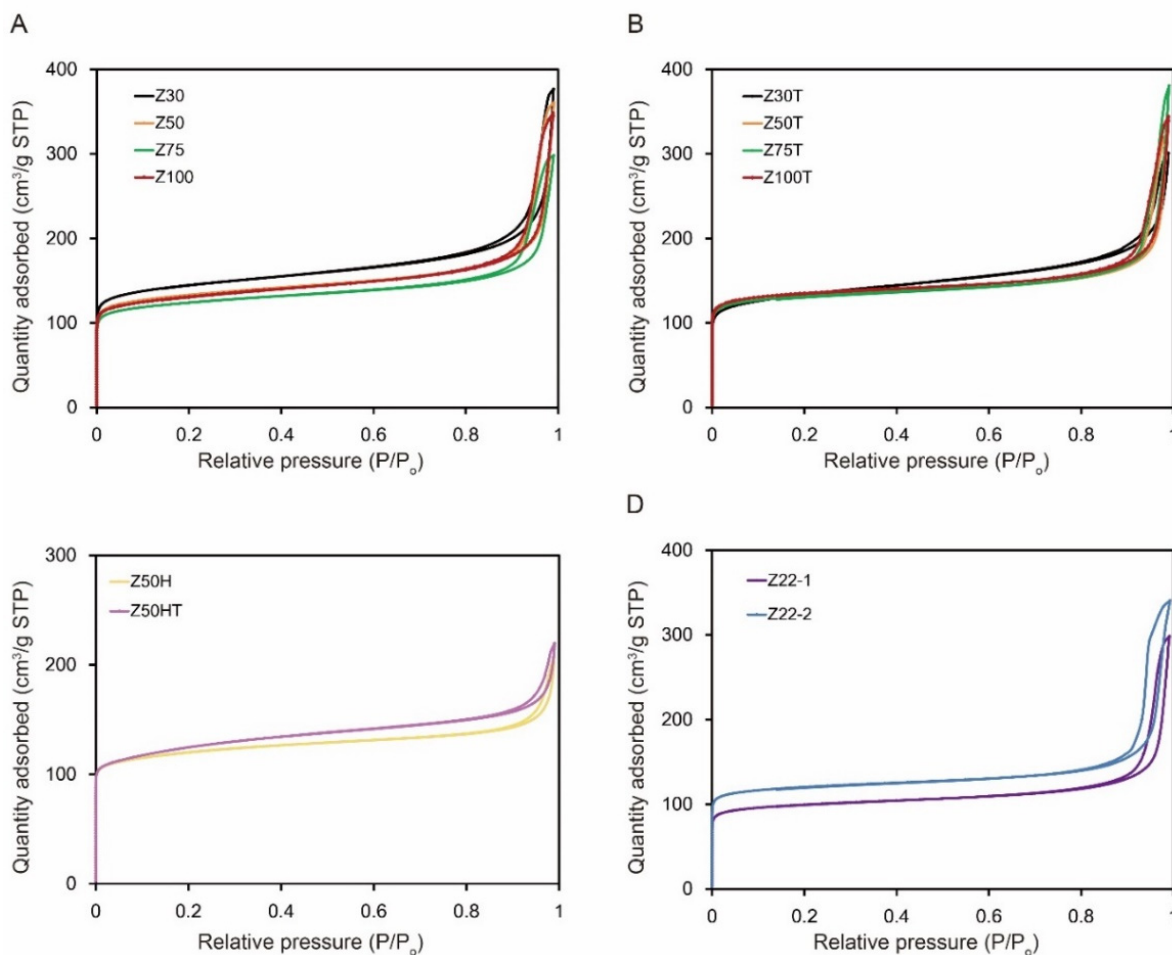

**Figure S2.** Nitrogen adsorption/desorption isotherms of calcined ZSM-5 samples: (A) Z30 (black), Z50 (yellow), Z75 (green), and Z100 (red); (B) Z30T (black), Z50T (yellow), Z75T (green), and Z100T (red); (C) Z50H (yellow) and Z50HT (pink); and (D) Z22-1 (purple) and Z22-2 (blue).

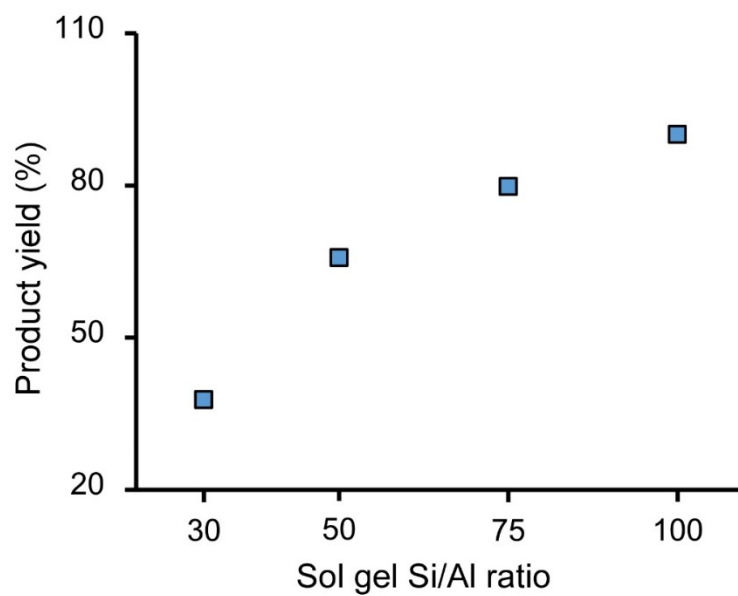

**Figure S3.** The approximate mass (yield) of collected ZSM-5 solid products from syntheses of varying sol gel Si/Al ratio. These samples correspond to as-synthesized (i.e. uncalcined) Z30, Z50, Z75, and Z100. The samples contain residual OSDA and water.

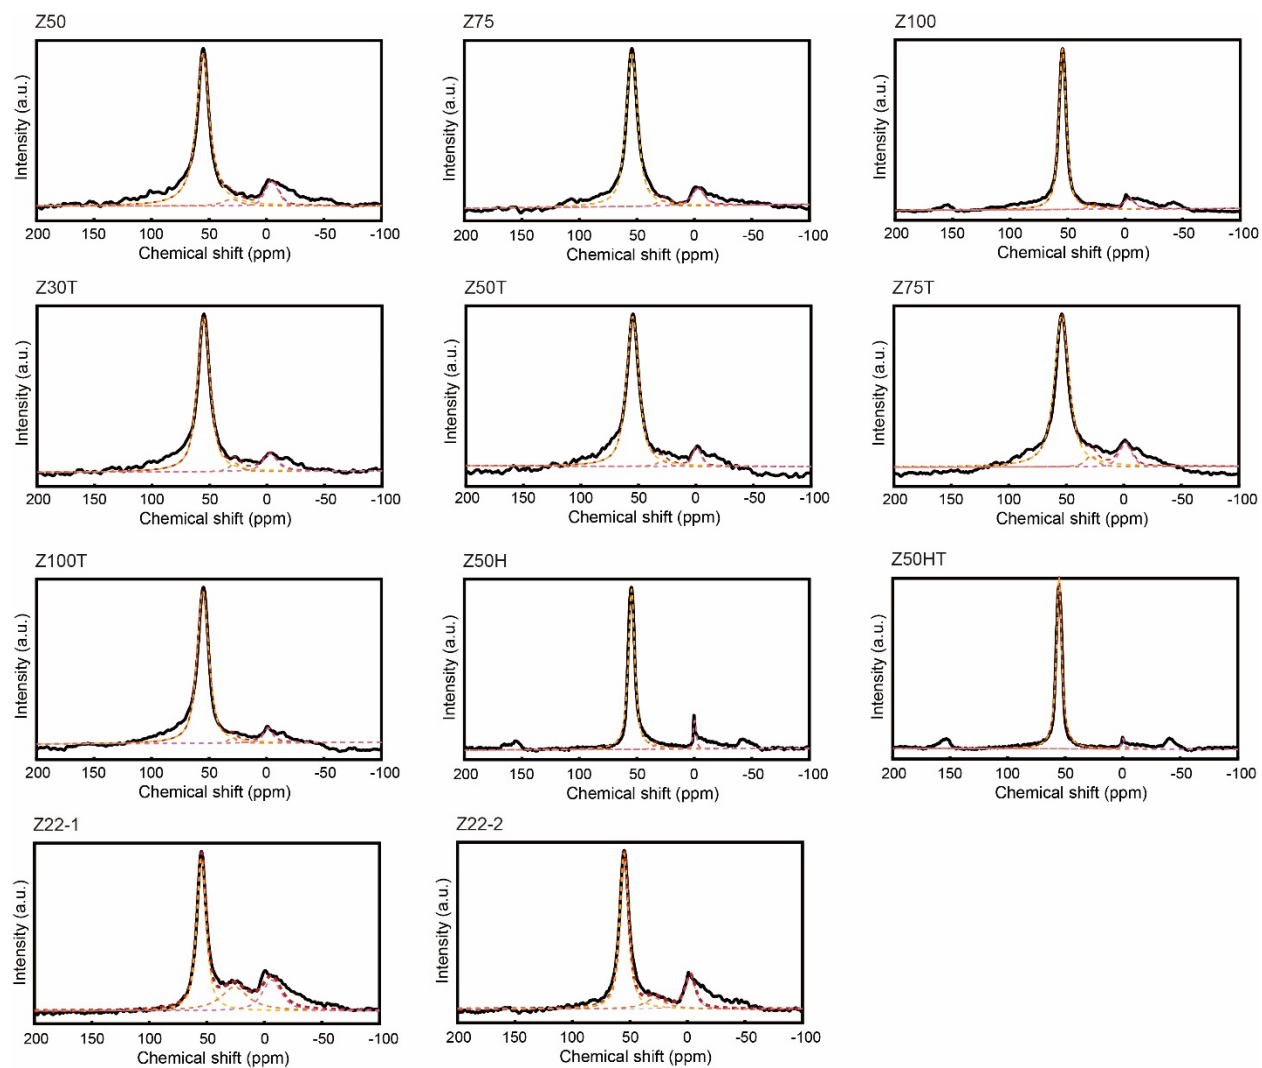

**Figure S4.** Deconvolution curve fittings of the  $^{27}\text{Al}$  MAS NMR spectra of H-Z50, H-Z75, H-Z100, H-30T, H-50T, H-75T, H-100T, H-50H, H-50HT, Z22-1, and Z22-2. Each sample is labeled above the respective NMR data.
